# Supplementary material for: Hydrogen sulfide decreases high glucose/palmitate-induced autophagy in endothelial cells by the Nrf2-ROS-AMPK signaling pathway
Source: PubMed Central journal article supplement (PMC4877995; doi:10.1186/s13578-016-0099-1), 2016-05-23

# Supplement

## Methods

### Cell culture and treatment

Primary cultures of rat aortic endothelial cells (RAECs), purchased from Chinese Academy of Sciences Cell Bank, were grown as monolayers at a density of  $5 \times 10^4$  cells/cm<sup>2</sup> in Dulbecco's modified Eagle medium (DMEM) and incubated at 37°C in humidified air containing 5% CO<sub>2</sub>. The medium contained 10% calf serum, 100 units/ml penicillin and 100 µg/ml streptomycin. Two days after seeding, the cultured RAEC were randomly divided into the following six groups and treatments: control group (low glucose, LG, 5.5 mmol/L), high glucose (HG, 40 mM) + Palmitate (Pal, 500µM), HG+Pal+NaHS (100 µM), HG+Pal+NAC (10 mM, an inhibitor of reactive oxygen species), HG+Pal+NaHS+rapamycin (5mM, as an autophagy catalyst) andHG+Pal+NaHS+AICAR (5-aminoimidazole-4-carboxamide ribonucleoside, 500µM, an catalyst of AMPK). Drugs were added directly to the culture for 48 h.

### Atg 7 siRNA transfection

The RAECs (80% confluent) were treated according to the manufacturer's instructions with Atg 7 short interfering RNAs (siRNAs) (mouse; Santa Cruz Biotechnology) for 48 h to inhibit Atg 7 expression. Transfected cells were confirmed by Western blot analysis of Atg 7 protein expression.

### Statistical analysis

Data are expressed as the mean ± standard error (SEM). Statistical analysis was analyzed by one-way ANOVA. Differences between individual groups were analyzed using Student's t-test. P <0.05 was considered statistically significant and p < 0.01 was considered very significant.

## **Results**

### **1. NaHS effecting on autophagy and apoptosis of RAECs with the treatment of HG and Pal by dose- and time-dependant ways.**

To demonstrate that NaHS, as an exogenous H<sub>2</sub>S donor, effects on autophagy and apoptosis in rat aortic endothelial cells(RAECs) in different time points and different doses, with the treatment of high glucose and palmitate, MDC and Hoechst33342/PI assays were used in our experiments .Our results revealed that 100μM and 200μM NaHS significantly decreased autophagy (Figure.S1B), apoptotic rates and necrotic rates (Figure.S1D) in RAECs with the treatment of HG and Pal compared with those in 50μM and 500μM NaHS groups. We also observed that NaHS affected autophagy and apoptotic and necrotic rates in RAECs with the treatment of HG and Pal in time-dependent manner, our data showed that 100μM NaHS inhibited autophagy (Figure.S1A), apoptotic and necrotic rates (Figure.S1C) in RAECs for 48h and 72h compared with those in HG and Pal group for 24h. Therefore, we chose 100μM NaHS to apply for 48h in our experiments.

### **2. Exogenous H<sub>2</sub>S regulating autophagy in RAECs treated with HG and Pal**

Rapamycin was used, an inhibitor of mTOR, as an autophagy catalyst to determine if rapamycin could reverse autophagy of RAECs with the H<sub>2</sub>S treatment, the expression of LC3 I/II and Atg7 was analyzed by Western blot. Our results demonstrated that pretreatment with 100μM NaHS of RAECs inhibited the expression of LC3II and Atg7 of RAECs with the treatment of Rapamycin. Exogenous H<sub>2</sub>S could reduce autophagy of RAECs with the treatment of HG and palmitate and rapamycin(Figure.S1).

### **3. Inhibition of autophagy in RAECs with the treatment of HG and Pal by Atg 7 siRNA**

Atg7, an E1-like enzyme, is essential for the autophagy conjugation system, the formation of autophagosomes and starvation-induced degradation of proteins and organelles in mammalian cells [6,7]. Atg7 was knocked down by siRNA silencing in

RAECs, Western blot analysis showed that the expression of Atg7 was significantly suppressed by Atg7 siRNA compared with that in control siRNA group. To validate Atg7 being involved in autophagy induced by exogenous H<sub>2</sub>S, the expression of LC3II was reduced in Atg7 silenced RAECs, compared to that in HG and Pal group (Figure.S3). Our results confirmed that knock down of Atg7 could rescue these endothelial cells from oxidative stress induced autophagy.

#### **4. Exogenous H<sub>2</sub>S affects mitophagy through AMPK pathway**

Parkin can play a critical role in mitophagy in mammalian cells. Some studies found that the intracellular location of Parkin is regulated by mitochondrial function. Parkin normally resides in the cytosol but it translocates to depolarized mitochondria[1]. Mitochondrial localized Parkin promoting the colocalization of mitochondria is observed in cells, which increases oxidative stress[2]. Beclin 1, the first identified mammalian autophagy protein [3], can function as a tumor suppressor in mammals and interacts with the anti-apoptotic Bcl-2 family proteins Bcl-2 and Bcl-XL but not Bax [4,5]. We investigated mitophagy-associated protein expression. The expression of Beclin and Parkin was analyzed by western blot. Our data found that the expression of Beclin and Parkin with the treatment of H<sub>2</sub>S and AICAR significantly decreased compared with those of HG and Pal groups (Figure.S4). Our results demonstrated that exogenous H<sub>2</sub>S inhibited mitophagy through AMPK pathway.

#### **5. The effect of NaHS on the relationship between apoptosis and autophagy**

The administration of 3-MA, an autophagy inhibitor, treated with RAECs. Our data showed that the cell death ratio(Figure.S5A) and the expression of cl-caspase-3 (Figure.S5B) in RAECs treated with NaHS, NAC and 3-MA decreased compared with that in RAECs treated with HG and palmitate group. To further demonstrate that autophagy inhibitor can rescue cells from HG+Pal-induced death. The cell death of RAECs treated by HG and Pal with Atg 7 siRNA was measured by Hoechst33342/PI staining. Our result showed that cell death ratio was higher in HG and Pal group that

in Atg 7 siRNA, NaHS and NAC groups (Figure.S5C). Our result revealed that apoptosis was possible partly dependent on autophagy.

#### References:

1. Y. Chen, G.W. Dorn 2nd., PINK1-phosphorylated mitofusin 2 is a Parkin receptor for culling damaged mitochondria, *Science* 340 (2013) 471–475.
2. M. Iguchi, Y. Kujuro, K. Okatsu, F. Koyano, H. Kosako, M. Kimura, et al., Parkin Catalyzed ubiquitin-ester transfer is triggered by PINK1-dependent phosphorylation, *J.Biol. Chem.* 288(2013) 22019–22032.
3. Liang, X. H., Jackson, S., Seaman, M., Brown, K., Kempkes, B., Hibshoosh, H., and Levine, B. (1999) *Nature* 402, 672–676
4. Aita, V. M., Liang, X. H., Murty, V. V., Pincus, D. L., Yu, W., Cayanis, E., Kalachikov, S., Gilliam, T. C., and Levine, B. (1999) *Genomics* 59, 59–65
5. Qu, X., Yu, J., Bhagat, G., Furuya, N., Hibshoosh, H., Troxel, A., Rosen, J., Eskelinen, E. L., Mizushima, N., Ohsumi, Y., Cattoretti, G., and Levine, B. (2003) *J. Clin. Investig.* 112, 1809–1820
6. Klionsky DJ. 2007. Autophagy: from phenomenology to molecular understanding in less than a decade. *Nat. Rev. Mol. Cell Biol.* 8:931–937.
7. Komatsu M, Wang QJ, Holstein GR, Friedrich VL, Jr, Iwata J, Kominami, E, Chait BT, Tanaka K, Yue Z. 2007. Essential role for autophagy protein Atg7 in the maintenance of axonal homeostasis and the prevention of axonal degeneration. *Proc. Natl. Acad. Sci. U. S. A.* 104:14489– 14494.

## Figure legends

Figure.S1 NaHS effected on autophagy and apoptosis of RAECs with the treatment of HG and Pal. (A) RAECs were treated with high glucose and palmitate, HG and Pal plus 100 $\mu$ M NaHS, and HG and Pal plus NAC for 24h, 48h, 72h, representative images showed bright dotted structure (autophagosomes) that accumulated in cells stained with MDC. Original magnification:40x. (B) RAECs were treated by HG and Pal with 50 $\mu$ M, 100 $\mu$ M, 200 $\mu$ M, and 500 $\mu$ M NaHS, respectively. (C and D) Representative photographs of double staining of PI and Hoechst 33342. The apoptotic cells were observed as nuclei pyknosis by Hoechst 33342. PI-positive cells (red) are regarded as the necrotic cells. RAECs were treated with high glucose and palmitate, HG and Pal plus 100 $\mu$ M NaHS, in time dependent manner(C) and in dose-dependent manner (D). The data represent the mean value  $\pm$  SE of independent experiments, \* $p$ <0.05 vs control. \*\* $p$ <0.01 vs control, # $p$ <0,05 vs HG and Pal

Figure.S2 RAECs were treated with HG and Pal in the presence of autophagy activator ( rapamycin) to determine the expression of LC3II/I and Atg7 by western blot analysis. The data represent the mean value  $\pm$  SE of independent experiments, \* $p$ <0.05 vs HG and Pal group.

Figure.S3 Atg 7 siRNA reducing the expression of LC I/II in RAECs treated with HG and Pal..(A) Atg7-siRNA inhibited the expression of Atg7.(B) Atg7 siRNA reduced the expression of LC3I/II in RAECs with the treatment of HG and Pal. \* $p$ <0.05 vs control group, \*\*\* $p$ <0.001 vs control siRNA group.

Figure.S4. RAECs were treated with HG and Pal and NaHS in presence of AMPK catalyst (AICAR) to determine the expression of mitophagy associated proteins (Parkin and Beclin 1) by western blot analysis. \* $p$ <0.05 vs Control group.

Figure.S5 The cell death of RAECs treated by HG and Pal with 3-MA and Atg 7 siRNA was measured by Hoechst33342/PI staining. (A) RAECs were treated by HG and Pal with3-MA. Representative photographs of double staining of PI and Hoechst 33342. The apoptotic cells were observed as nuclei pyknosis by Hoechst 33342. PI-positive cells (red) are regarded as the necrotic cells. (B) The expression of cl-caspase-3 in RAECs with the treatment of HG and palmitate. (C) The cell death of RAECs was treated by HG and Pal with Atg 7 siRNA transfection. The results were expressed as the mean  $\pm$ SD. (\*  $p$ < 0.05 vs control group, n=4)

Figure.S1

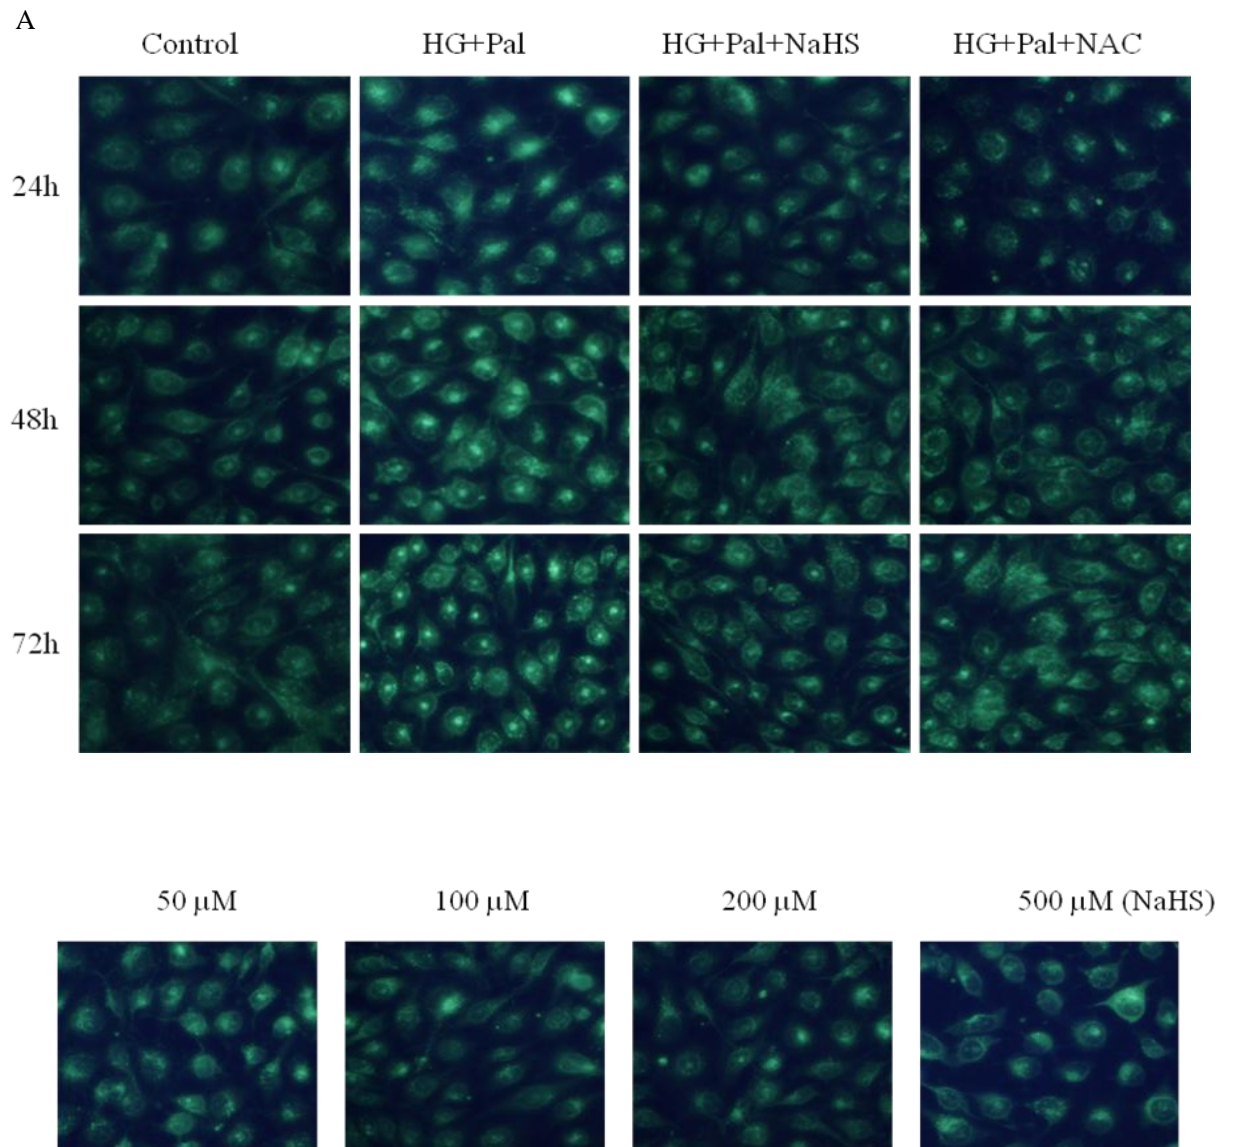

C

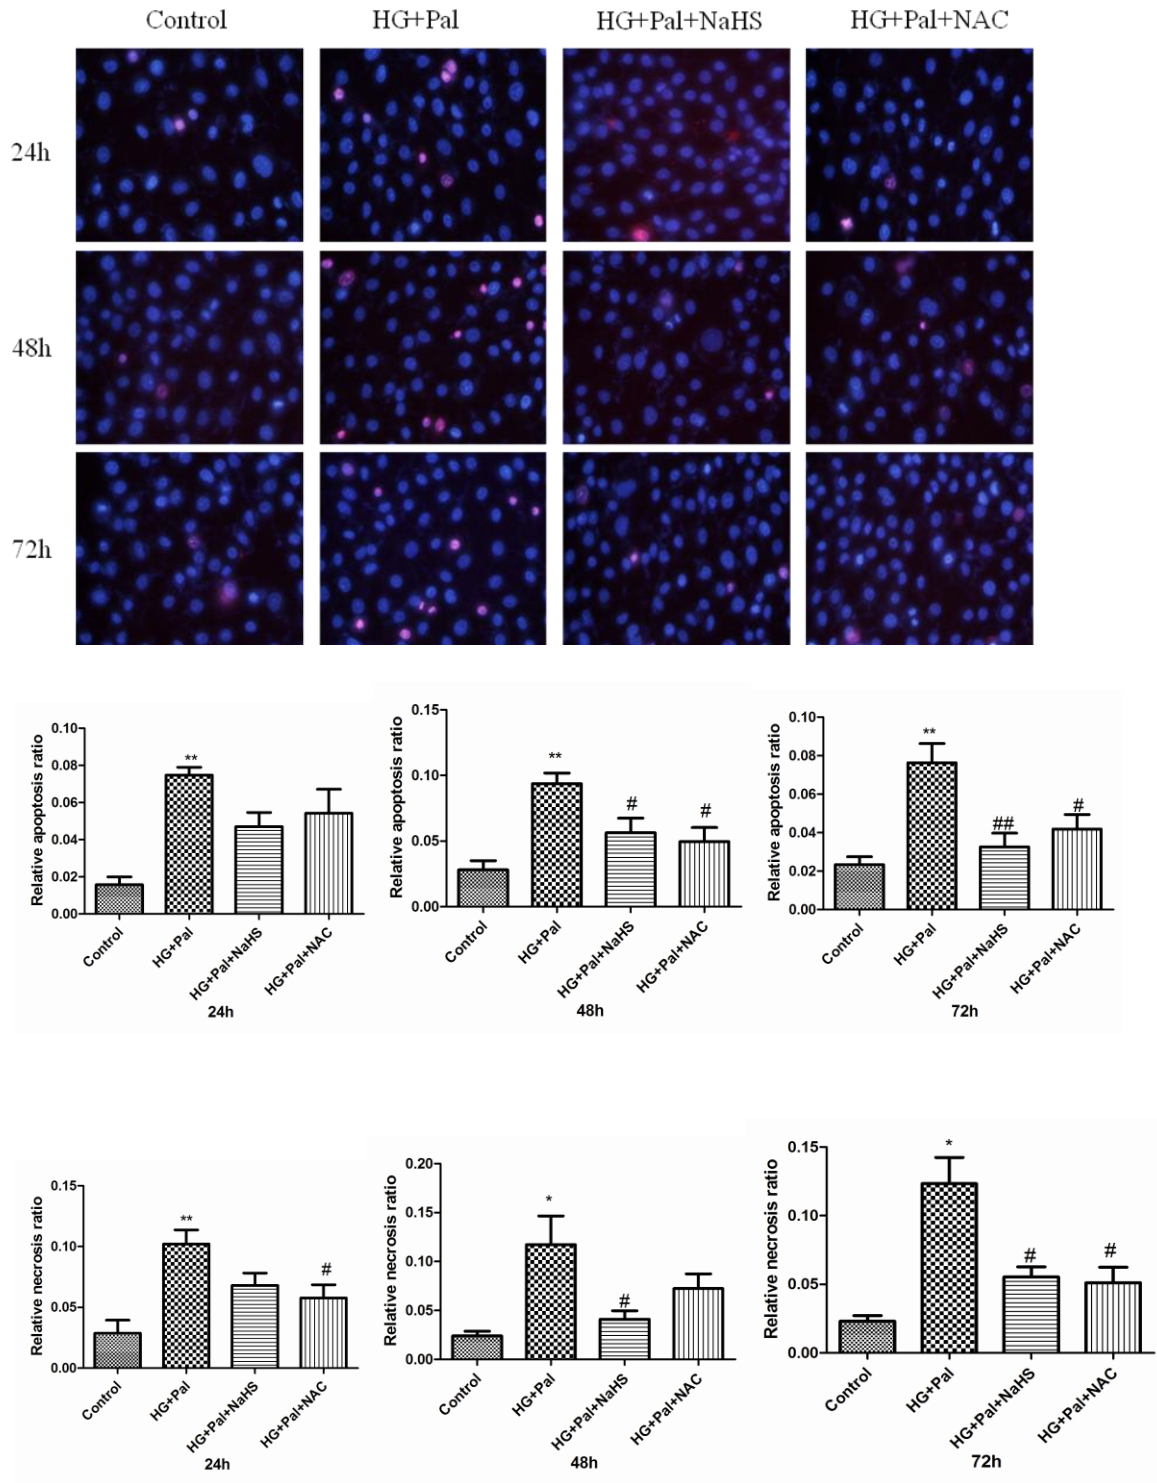

D                      50  $\mu$ M                      100  $\mu$ M                      200  $\mu$ M                      500  $\mu$ M (NaHS)

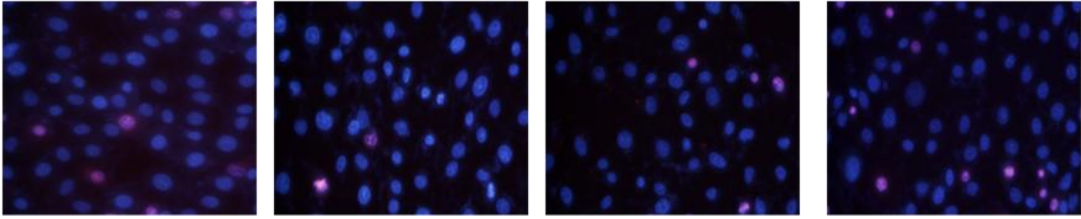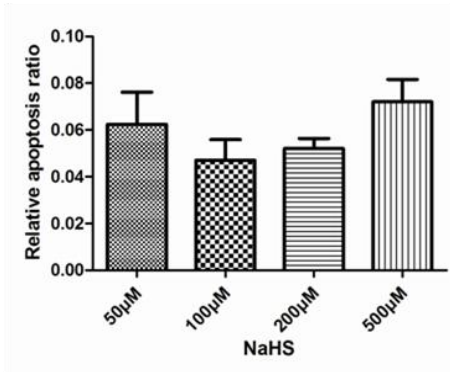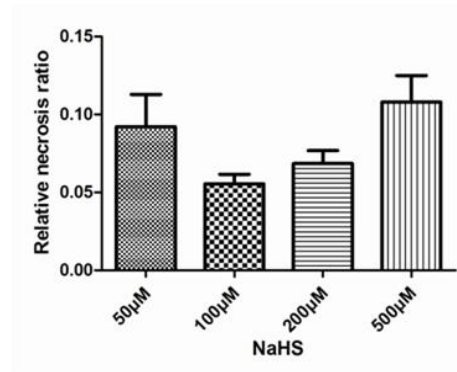



Figure.S2

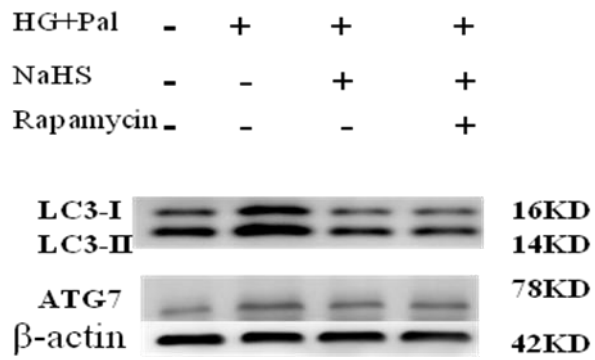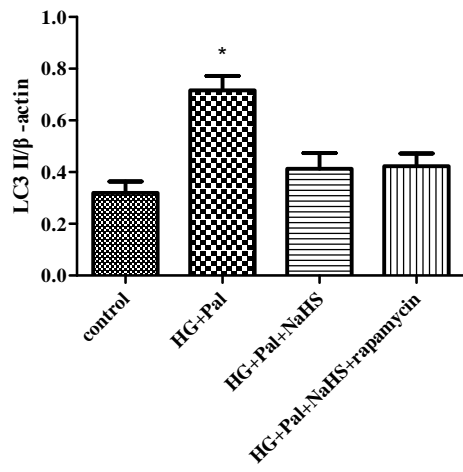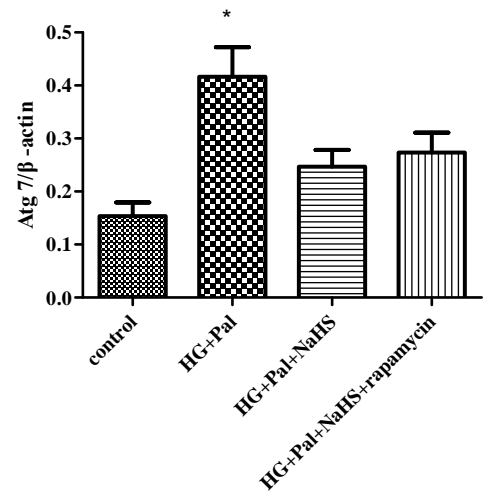

Figure.S3

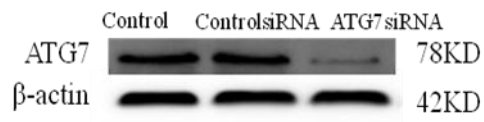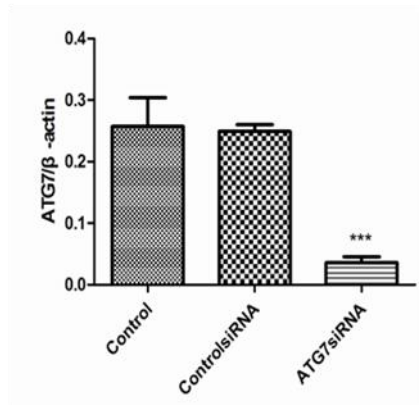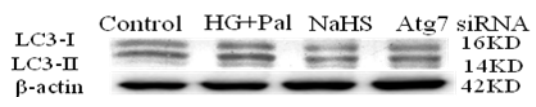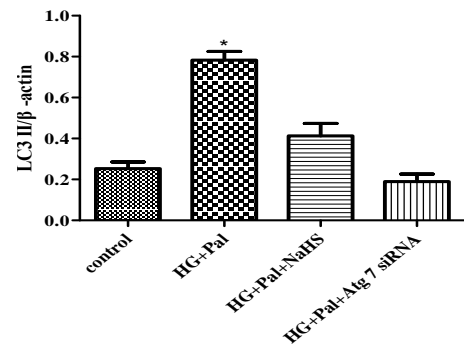

Figure.S4

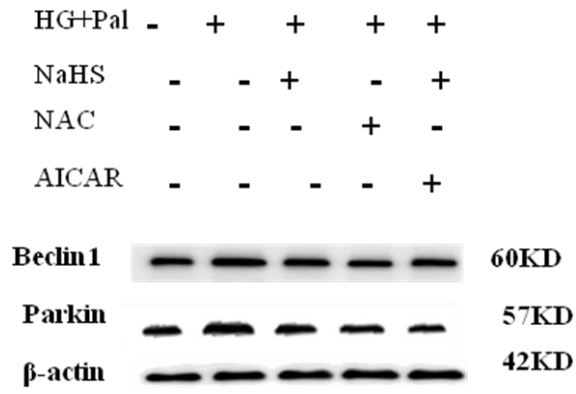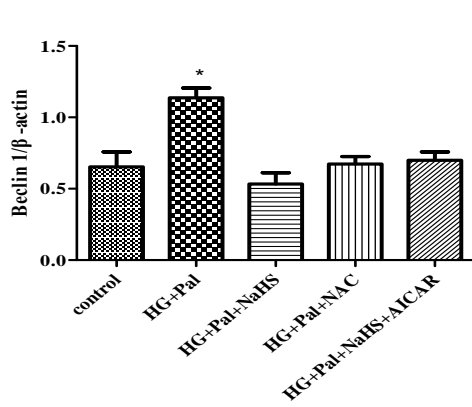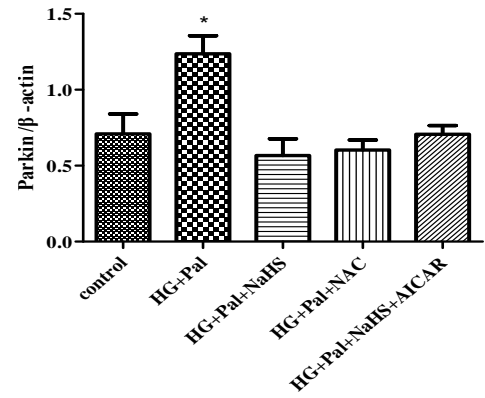

Figure.S5

A

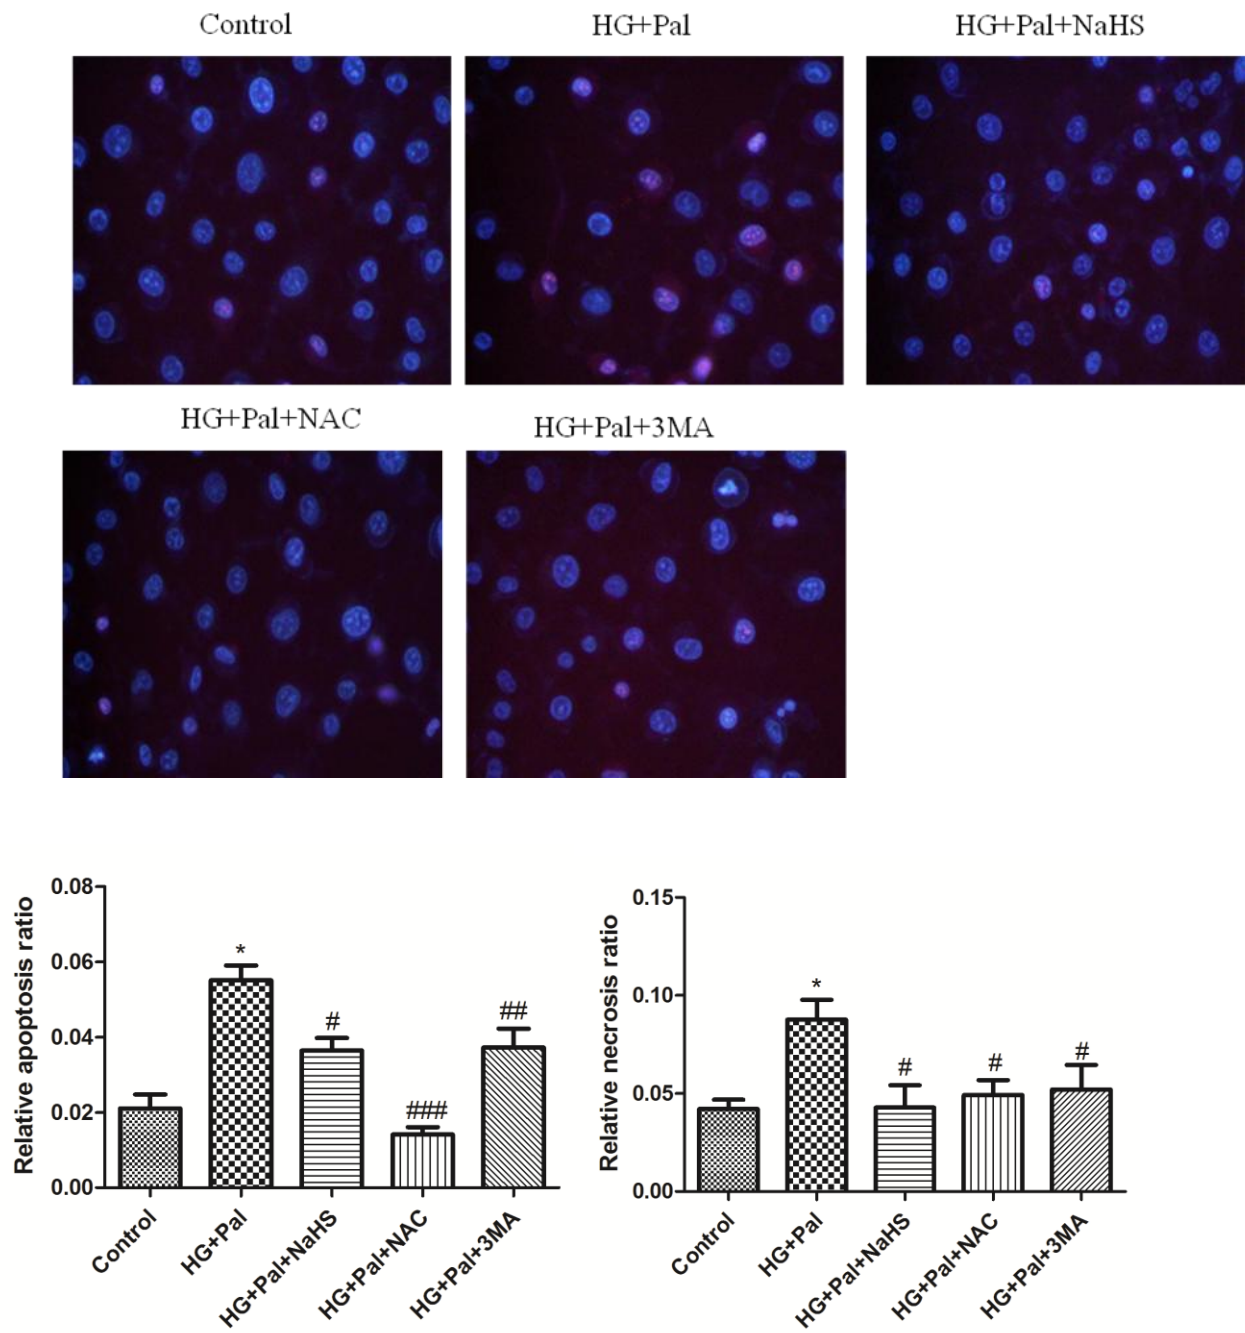

B

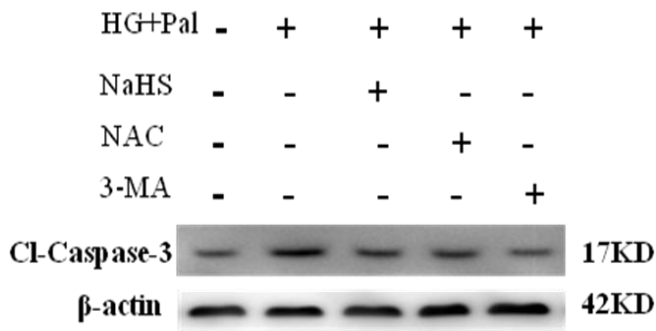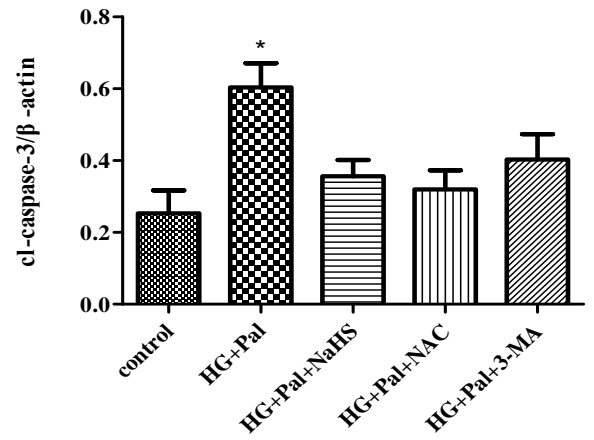

C

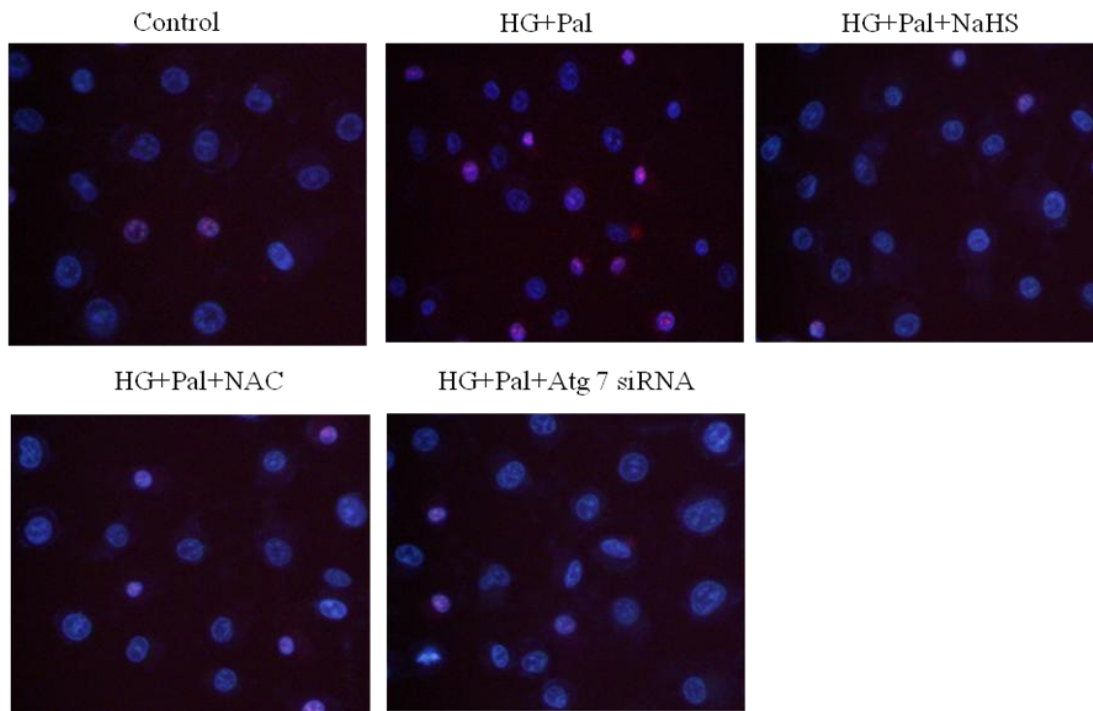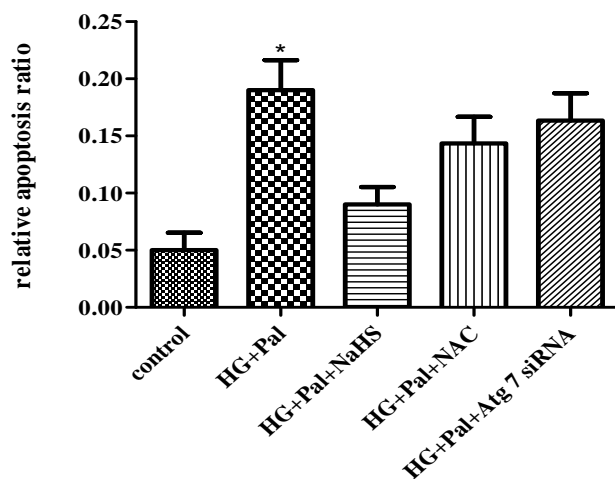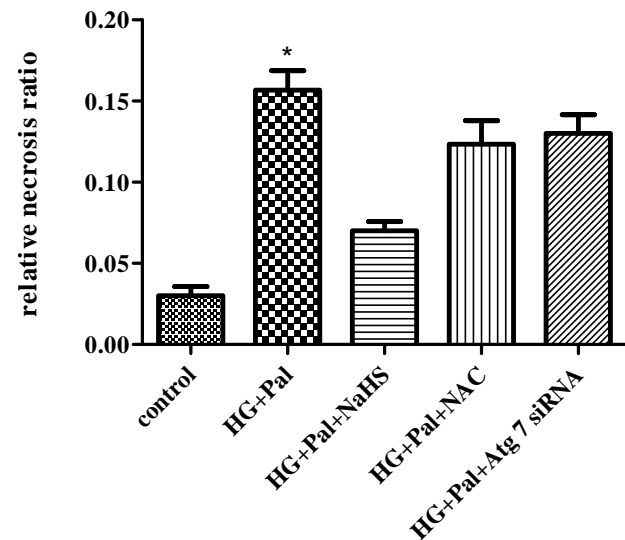

Supplement: 13578_2016_99_MOESM1_ESM.pdf [file 13578_2016_99_MOESM1_ESM.pdf]
